# Supplementary material for: Synthesis of the full-length hepatitis B virus core protein and its capsid formation
Source: Royal Society of Chemistry journal article supplement (doi:10.1039/d3ob02099a), 2024-01-01
Supplement: d3ob02099a1.pdf [file d3ob02099a1.pdf]

*Supplementary Information*

**Synthesis of the full-length hepatitis B virus core protein and its capsid formation**

Keisuke Aoki,<sup>a,b</sup> Shugo Tsuda,<sup>c</sup> Naoko Ogata,<sup>b</sup> Michiyo Kataoka,<sup>d</sup> Jumpei Sasaki,<sup>a</sup> Shinsuke Inuki,<sup>a</sup>  
Hiroaki Ohno,<sup>a</sup> Koichi Watashi,<sup>e</sup> Taku Yoshiya<sup>c,f</sup> and Shinya Oishi<sup>a,b,\*</sup>

<sup>a</sup> *Graduate School of Pharmaceutical Sciences, Kyoto University, Sakyo-ku, Kyoto 606-8501, Japan*

<sup>b</sup> *Laboratory of Medicinal Chemistry, Kyoto Pharmaceutical University, Yamashina-ku, Kyoto 607-8412, Japan*

<sup>c</sup> *Peptide Institute, Inc. Ibaraki, Osaka 567-0085, Japan*

<sup>d</sup> *Department of Pathology, National Institute of Infectious Disease, Shinjuku-ku, Tokyo 162-8640, Japan*

<sup>e</sup> *Research Center for Drug and Vaccine Development, National Institute of Infectious Disease, Shinjuku-ku, Tokyo 162-8640, Japan*

<sup>f</sup> *Institute for Protein Research, Osaka University, Suita, Osaka 565-0871, Japan*

**Contents**

|                                                       |        |
|-------------------------------------------------------|--------|
| Screening concept of mirror-image screening (Fig. S1) | S2     |
| Previous synthetic studies on Cp149 (Fig. S2)         | S3     |
| CD analysis of synthetic HBV core protein (Fig. S3)   | S4     |
| References                                            | S5     |
| LC-MS chromatograms and mass spectrometry data        | S6–S10 |

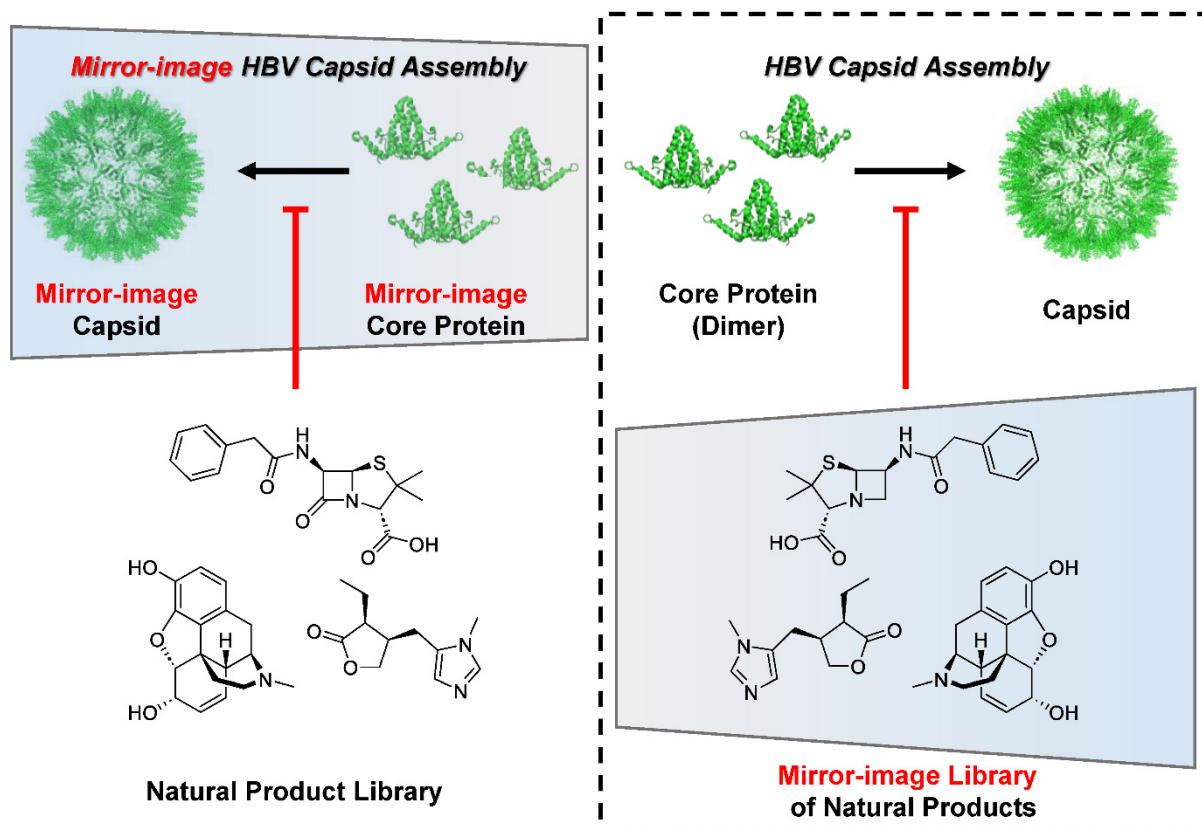

**Fig. S1** Screening concept for HBV capsid assembly modulators from a virtual mirror-image library of natural products. Screening of the natural product library using the mirror-image HBV core protein corresponds to the mirror-image library of natural products using the natural HBV core protein in a mirror. The HBV core protein structure was obtained from the Protein Data Bank (PDB ID: 6HTX).

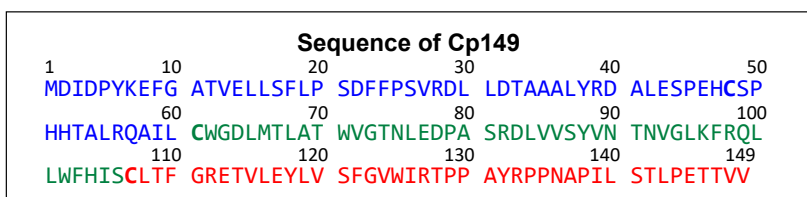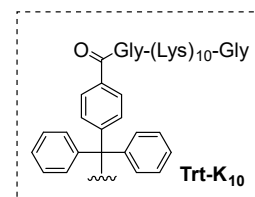

### N-to-C synthesis

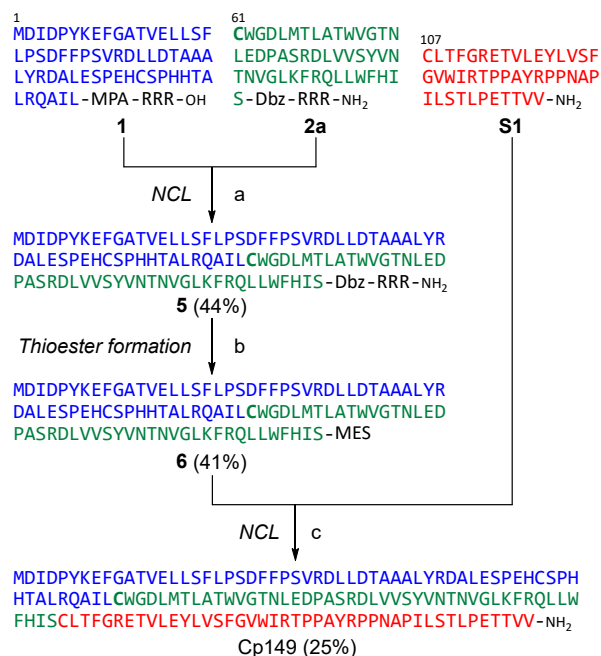

### C-to-N synthesis using solubilizing Trt-K<sub>10</sub> tag

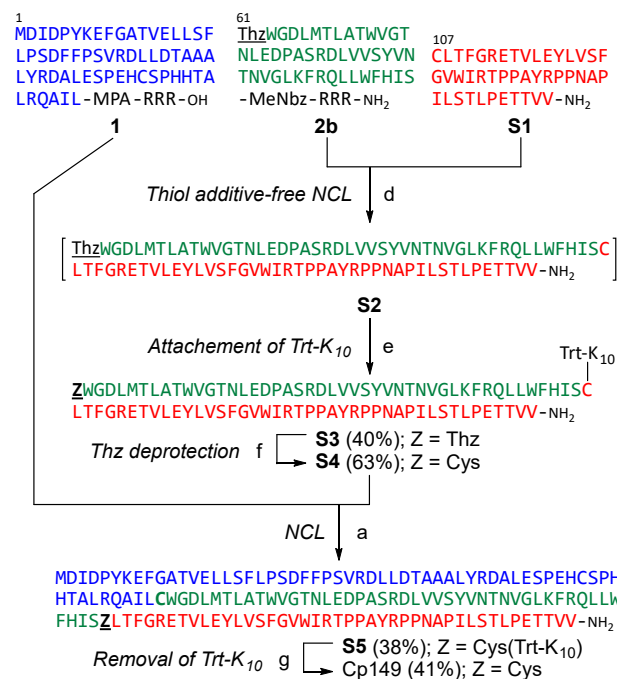

**Fig. S2** Previous synthetic studies on Cp149.<sup>S1</sup> *Reagents and conditions:* (a) MPAA, TCEP, 6 M guanidine·HCl, and 200 mM phosphate buffer (pH 7.0); (b) NaNO<sub>2</sub>, 6 M guanidine·HCl, 200 mM phosphate buffer, then MESNa and TCEP; (c) MPAA, TCEP, 6 M guanidine·HCl, and 200 mM phosphate buffer (pH 7.0) containing 25% NMP; (d) 1,2,4-triazole, TCEP, 6 M guanidine·HCl, and 100 mM phosphate buffer (pH 7.1); (e) Trt(OH)-K<sub>10</sub> and TFA; (f) methoxyamine, 6 M guanidine·HCl, and 200 mM phosphate buffer (pH 4.0); (g) TFA/TIS (95:5). *Abbreviations:* Dbz, 3,4-diaminobenzoic acid; MeNbz, *N*-acyl-*N'*-methylaclyurea; MES, 2-mercaptethanesulfonate; MPA, 3-mercaptopropionic acid; MPAA, 4-mercaptophenylacetic acid; TCEP, tris(2-carboxyethyl)phosphine; Thz, thiazolidine carboxylic acid.

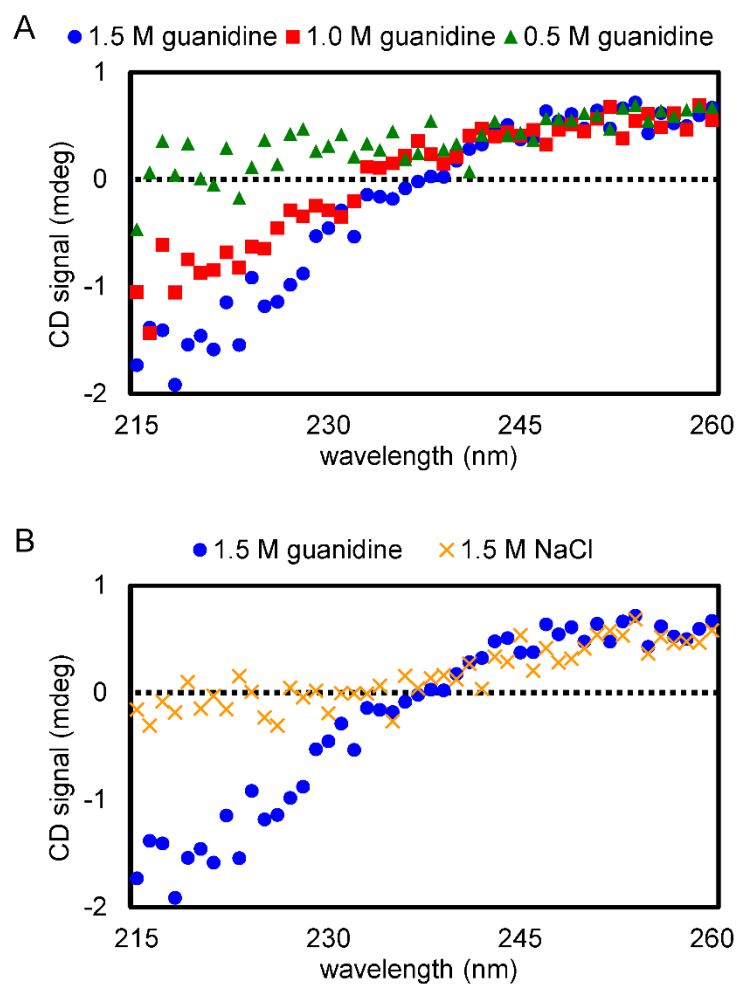

**Fig. S3** CD analysis of the synthetic HBV core protein under various conditions. (A) CD spectra of synthetic Cp183(C183A) at various concentrations of guanidine. (B) Comparison of synthetic Cp183(C183A) CD spectra in a 1.5M guanidine or NaCl solution.

## **References**

- S1 S. Tsuda, M. Mochizuki, H. Ishiba, K. Yoshizawa-Kumagaye, H. Nishio, S. Oishi and T. Yoshiya, *Angew. Chem. Int. Ed.*, 2018, **57**, 2105–2109.

## Analytical HPLC Chromatograms and Mass Spectrometry Data of Synthetic Peptides

[Thz<sup>107</sup>]-Cp183<sup>107-153</sup>-MPAA (3)

ThzLTFGRETVLEYLVSFGVWIRTPPAYRPPNAPILSTLPETTVVRRRG-MPAA

3

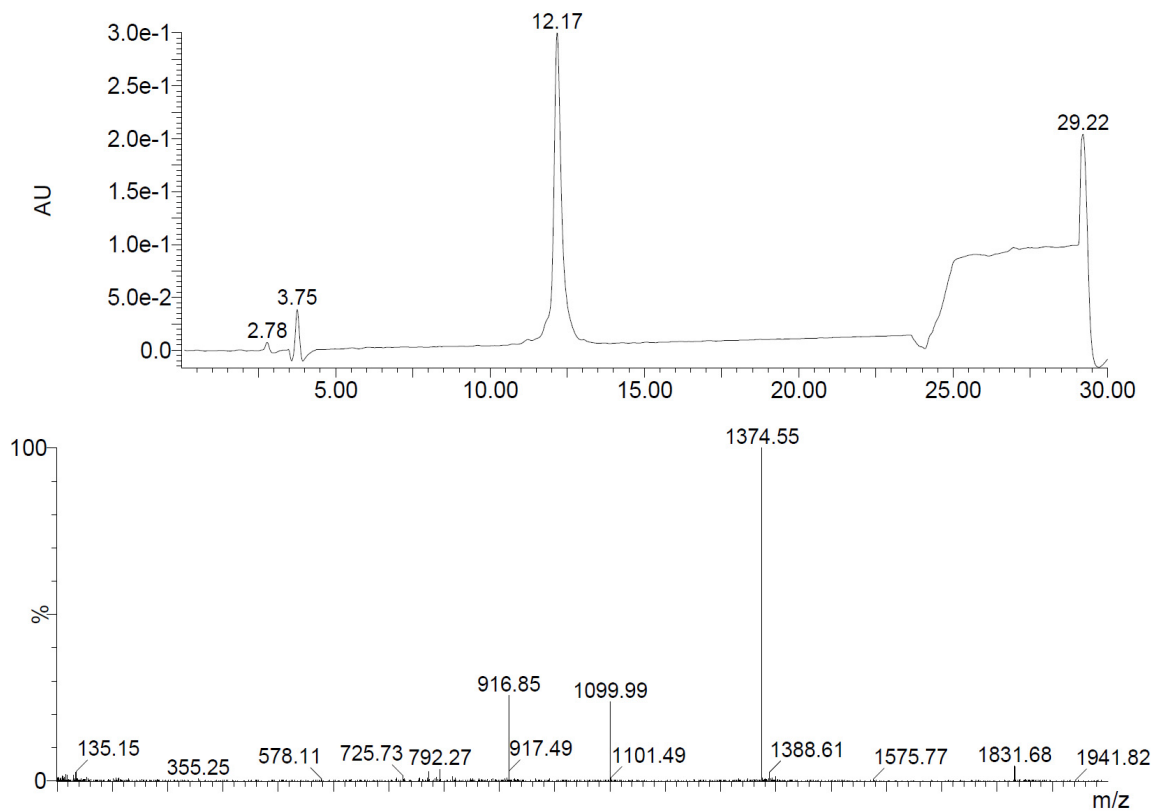

**HPLC conditions:** Cosmosil 5C18-AR300 column (Nacalai Tesque, 4.6 × 250 mm), linear gradient of 35–55% CH<sub>3</sub>CN containing 0.1% TFA at a flow rate of 1 mL/min over 20 min.

**MS analysis:** Expected mass based on the sequence: 5493.45; Major observed ions: [M+6H]<sup>6+</sup>  $m/z$  = 916.85, [M+5H]<sup>5+</sup>  $m/z$  = 1099.99, [M+4H]<sup>4+</sup>  $m/z$  = 1374.55, [M+3H]<sup>3+</sup>  $m/z$  = 1831.68.

[Ala<sup>183</sup>]-Cp183<sup>154-183</sup> (4)

RSPRRRTSPRRRRSQSPRRRRSQSRESQA-OH  
4

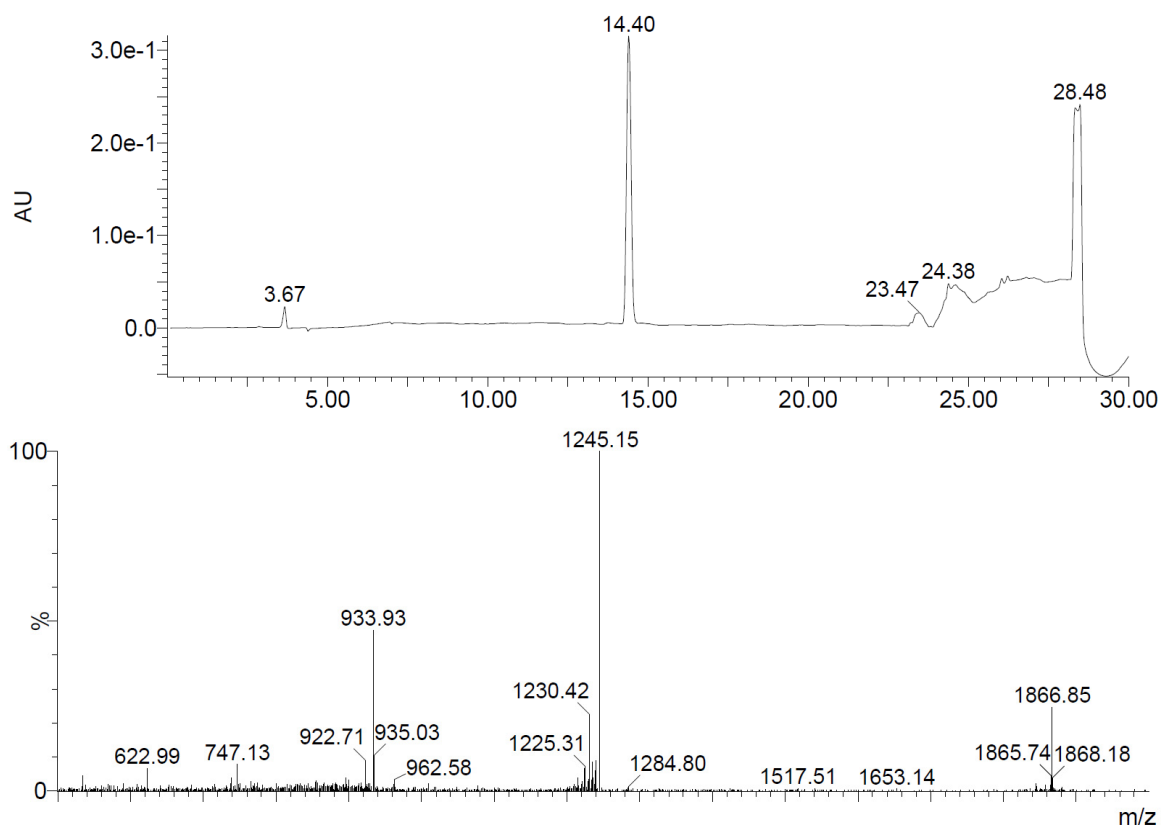

**HPLC conditions:** Cosmosil 5C18-AR300 column (Nacalai Tesque, 4.6 × 250 mm), linear gradient of 0–20% CH<sub>3</sub>CN containing 0.05% TFA at a flow rate of 1 mL/min over 20 min.

**MS analysis:** Expected mass based on the sequence: 3732.18; Major observed ions: [M+6H]<sup>6+</sup>  $m/z$  = 622.99, [M+5H]<sup>5+</sup>  $m/z$  = 747.13, [M+4H]<sup>4+</sup>  $m/z$  = 933.93, [M+3H]<sup>3+</sup>  $m/z$  = 1245.15, [M+2H]<sup>2+</sup>  $m/z$  = 1866.85.

[Ala<sup>183</sup>]-Cp183<sup>107-183</sup> (8)

CLTFGRETVLEYLVVSGVWIRTPPAYRPPNAPILSTLPET  
TVVRRRGSRPRRRTSPRRRRSQSPRRRRSQSRESQA-OH

8

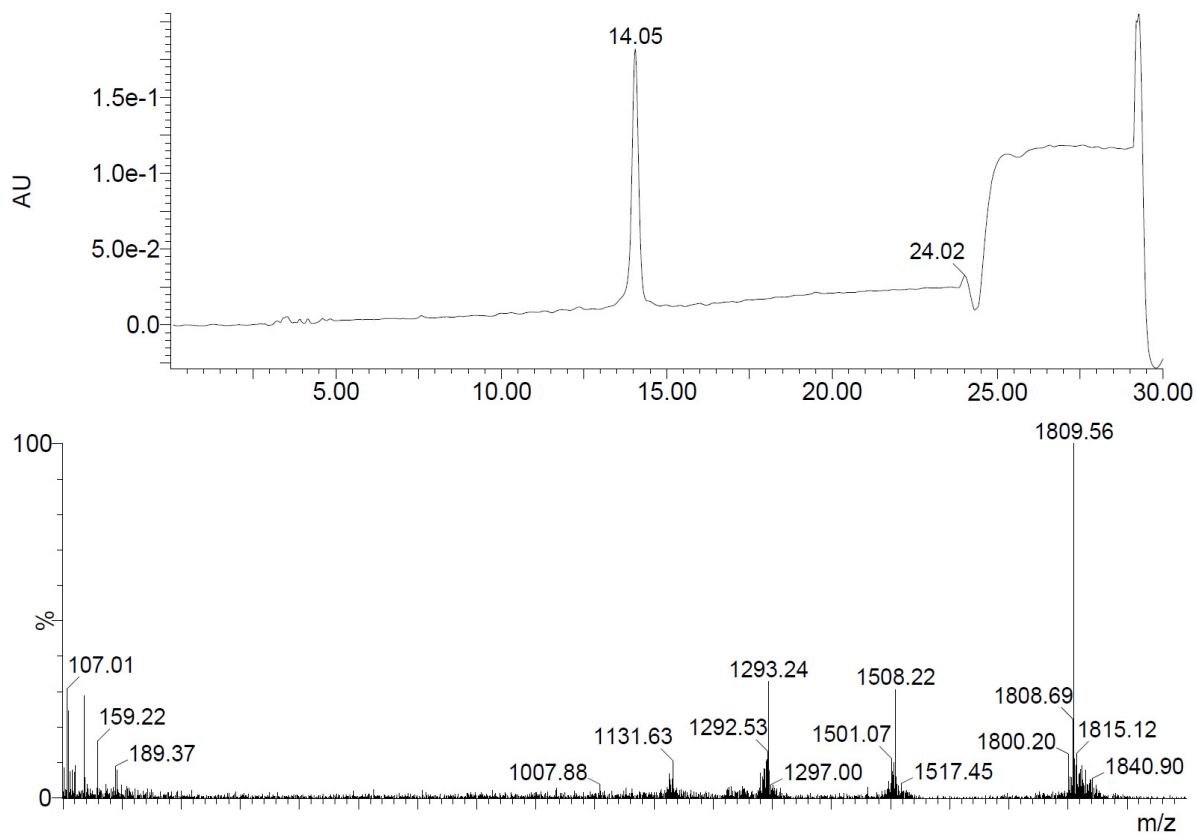

**HPLC conditions:** Cosmosil 5C4-AR300 column (Nacalai Tesque, 4.6 × 250 mm), linear gradient of 30–50% CH<sub>3</sub>CN containing 0.1% TFA at a flow rate of 1 mL/min over 20 min.

**MS analysis:** Expected mass based on the sequence: 9045.41; Major observed ions: [M+8H]<sup>8+</sup>  $m/z$  = 1131.63, [M+7H]<sup>7+</sup>  $m/z$  = 1293.24, [M+6H]<sup>6+</sup>  $m/z$  = 1508.22, [M+5H]<sup>5+</sup>  $m/z$  = 1809.56.



[Ala<sup>183</sup>]-Cp183<sup>1-183</sup> (9)

MDIDPYKEFGATVELLSFLPSDFFPSVRDLLDTAAALYRDALESPEH  
CSPHHTALRQAILCWGDLMTLATWVGTNLEDPASRDLVVS YVNTNVG  
LKFRQLLWFHISCLTFGRETVLEYLV SFGWIRT PPA YRPPNAPILS  
TLPETTVVRRRGRSPRRRTPSPRRRRSQSPRRRRSQSRESQA-OH

Cp183 (C183A) [9]

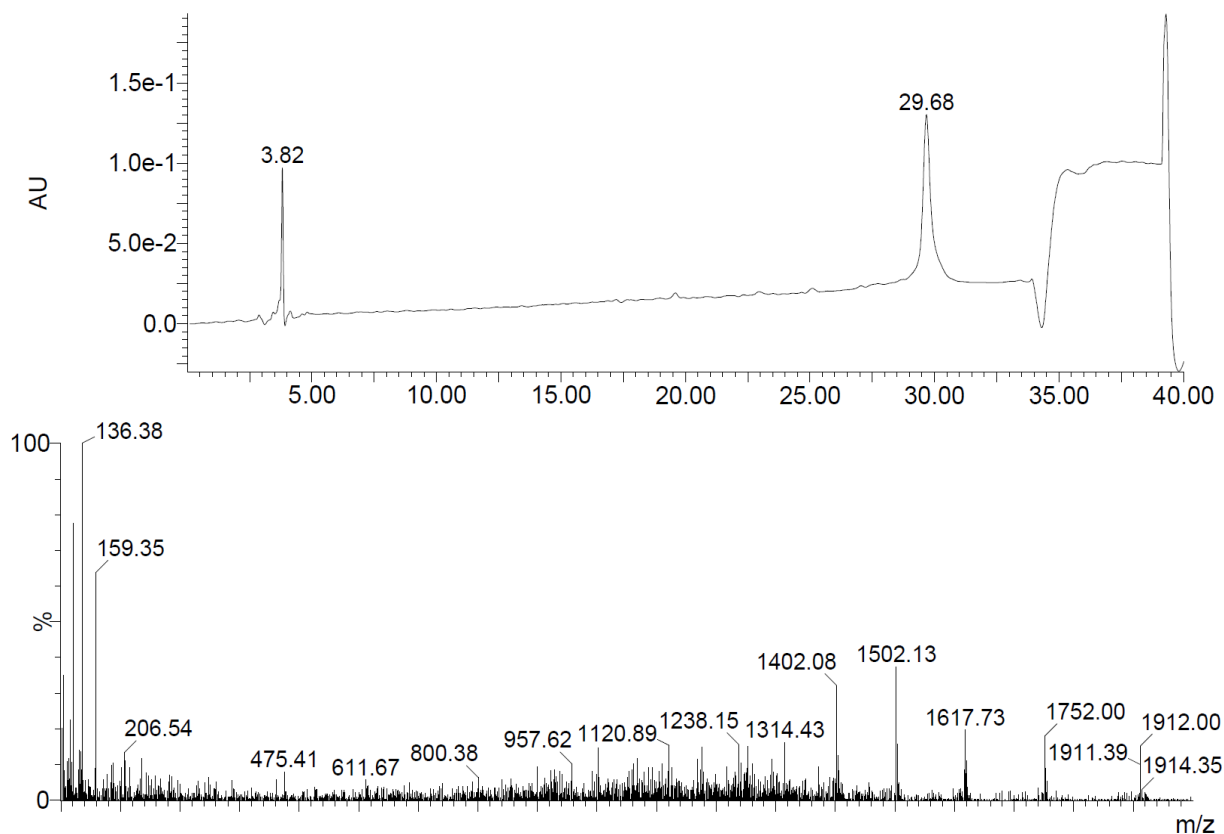

**HPLC conditions:** Cosmosil 5C4-AR300 column (Nacalai Tesque, 4.6 × 250 mm), linear gradient of 30–60% CH<sub>3</sub>CN containing 0.1% TFA at a flow rate of 1 mL/min over 30 min.

**MS analysis:** Expected mass based on the sequence: 21010.06; Major observed ions: [M+15H]<sup>15+</sup>  $m/z = 1402.08$ , [M+14H]<sup>14+</sup>  $m/z = 1502.13$ , [M+13H]<sup>13+</sup>  $m/z = 1617.73$ , [M+12H]<sup>12+</sup>  $m/z = 1752.00$ , [M+11H]<sup>11+</sup>  $m/z = 1912.00$ .

[Ala<sup>183</sup>]-Cp183<sup>61-183</sup> (11)

CWGDLMTLATWVGTNLEDPASRDLVVSYVNTNVGLKFRQLLW  
FHISCLTFGRETVLEYLVSEFGVWIRTPPAYRPPNAPILSTLP  
ETTVVRRRGRSPRRRTSPRRRRSQSPRRRRSQSRESQA-OH

11

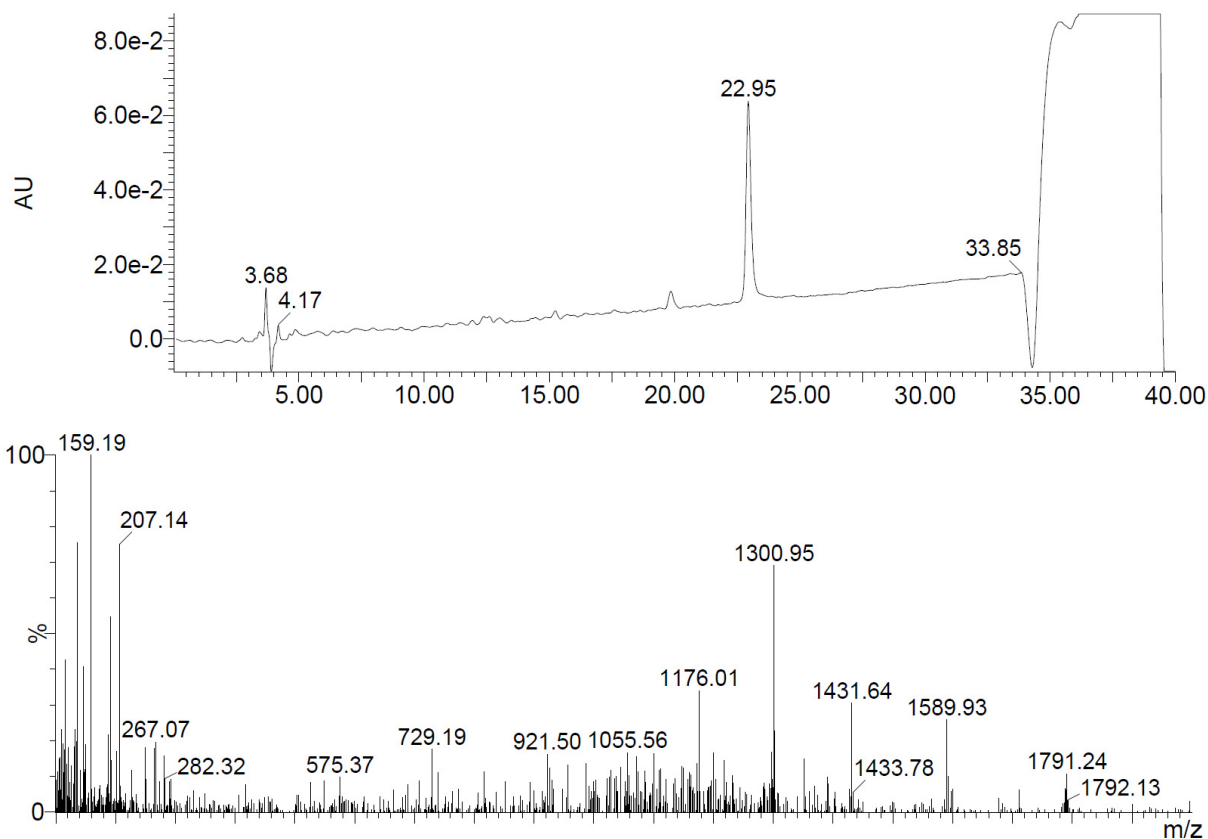

**HPLC conditions:** Cosmosil 5C4-AR300 column (Nacalai Tesque, 4.6 × 250 mm), linear gradient of 30–60% CH<sub>3</sub>CN containing 0.1% TFA at a flow rate of 1 mL/min over 30 min.

**MS analysis:** Expected mass based on the sequence: 14295.46; Major observed ions: [M+11H]<sup>11+</sup>  $m/z = 1300.95$ , [M+10H]<sup>10+</sup>  $m/z = 1431.64$ , [M+9H]<sup>9+</sup>  $m/z = 1589.93$ .
